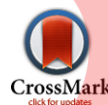

# Adaptive Neuro-Fuzzy Methodology for Noise Assessment of Wind Turbine

Shahaboddin Shamshirband<sup>2,3\*</sup>, Dalibor Petković<sup>1</sup>, Roslan Hashim<sup>4,5</sup>, Shervin Motamedi<sup>6</sup>

**1** University of Niš, Faculty of Mechanical Engineering, Department for Mechatronics and Control, Niš, Serbia, **2** Department of Computer Science, Chalous Branch, Islamic Azad University (IAU), Chalous, Mazandaran, Iran, **3** Department of Computer System and Technology, Faculty of Computer Science and Information Technology, University of Malaya, Kuala Lumpur, Malaysia, **4** Institute of Ocean and Earth Sciences (IOES), University of Malaya, Kuala Lumpur, Malaysia, **5** Department of Civil Engineering, Faculty of Engineering, University of Malaya, Kuala Lumpur, Malaysia, **6** Department of Civil Engineering, Faculty of Engineering, University of Malaya, Kuala Lumpur, Malaysia

## Abstract

Wind turbine noise is one of the major obstacles for the widespread use of wind energy. Noise tone can greatly increase the annoyance factor and the negative impact on human health. Noise annoyance caused by wind turbines has become an emerging problem in recent years, due to the rapid increase in number of wind turbines, triggered by sustainable energy goals set forward at the national and international level. Up to now, not all aspects of the generation, propagation and perception of wind turbine noise are well understood. For a modern large wind turbine, aerodynamic noise from the blades is generally considered to be the dominant noise source, provided that mechanical noise is adequately eliminated. The sources of aerodynamic noise can be divided into tonal noise, inflow turbulence noise, and airfoil self-noise. Many analytical and experimental acoustical studies performed the wind turbines. Since the wind turbine noise level analyzing by numerical methods or computational fluid dynamics (CFD) could be very challenging and time consuming, soft computing techniques are preferred. To estimate noise level of wind turbine, this paper constructed a process which simulates the wind turbine noise levels in regard to wind speed and sound frequency with adaptive neuro-fuzzy inference system (ANFIS). This intelligent estimator is implemented using Matlab/Simulink and the performances are investigated. The simulation results presented in this paper show the effectiveness of the developed method.

**Citation:** Shamshirband S, Petković D, Hashim R, Motamedi S (2014) Adaptive Neuro-Fuzzy Methodology for Noise Assessment of Wind Turbine. PLoS ONE 9(7): e103414. doi:10.1371/journal.pone.0103414

**Editor:** Catalin Buiu, Politehnica University of Bucharest, Romania

**Received:** March 18, 2014; **Accepted:** June 29, 2014; **Published:** July 30, 2014

**Copyright:** © 2014 Shamshirband et al. This is an open-access article distributed under the terms of the Creative Commons Attribution License, which permits unrestricted use, distribution, and reproduction in any medium, provided the original author and source are credited.

**Data Availability:** The authors confirm that all data underlying the findings are fully available without restriction. The data set that underlies our conclusions are in the paper.

**Funding:** The authors express their sincere thanks for the funding support they received from HIR-MOHE University of Malaya under Grant No. UM.C/HIR/MOHE/ENG/34. This paper is also supported by Project Grant TP35005 "Research and development of new generation wind turbines of high-energy efficiency" (2011–2014) financed by Ministry of Education, Science and Technological Development, Republic of Serbia. The funders had no role in study design, data collection and analysis, decision to publish, or preparation of the manuscript.

**Competing Interests:** The authors have declared that no competing interests exist.

\* Email: shamshirband1396@gmail.com

## Introduction

In recent years, the generations of power by wind energy are obtaining a considerable attention as an alternative to conventional fossil, coal or nuclear sources. However, wind energy also has several disadvantages, which are hindering its global use. The introduction of micro wind turbines in built-up areas has been limited due to a number of issues such as low wind speeds, high turbulence and noise issues. Noise emissions have proved to be one of the major technical barriers to the introduction of micro wind turbines within the built environment. Wind turbine has two major noise components, mechanical and aerodynamic noise. The mechanical noise became no longer critical issue because of many efforts for dropping its level. However, the noise aerodynamically generated from blades is still important issue and moreover, it is a barrier to the development of the wind turbine industry. The aerodynamic noise emitted from the wind turbine blades can be broadly classified as discrete frequency (tonal) noise and broadband noise. The tonal noise is generally low frequency and due to the disturbance in the flow caused by the movement of rotating blade. The broadband noise is higher frequency and due to various types of turbulent flow interaction with the blades.

Aerodynamic noise is one of the most serious barriers in wind energy development. To develop technologies for wind turbine noise reduction and assessment, noise needs to be predicted precisely.

Sound from wind turbines has been investigated for some years now. In article [1] the change in the noise strength due to blade flexibility of wind turbine was examined. This research showed that elastic blades decreased broadband noise because pitching motion reduced the angle of attack. The effect of turbulence on the noise emissions from a micro-scale horizontal axis wind turbine (HAWT) was carried out in [2]. The purpose of this investigation was to further understand the noise emissions from a horizontal axis micro wind turbine sited within the built environment. The first principle based numerical method for predicting the noise radiated from the rotating HAWT blades was developed and validated in [3]. The hybrid methodology was used where Reynolds-averaged Navier-Stokes (RANS) based computational fluid dynamics (CFD) solver is used to calculate the aerodynamic noise sources. Characteristics of noise propagation from wind turbine was studied in [4] by using the integrated numerical methods based on Ray theory. An automatic measurement platform based on powerful LabVIEW was designed and

**Table 1.** Statistical properties of wind turbine noise for two inputs.

| Wind turbine noise |               |                    |               |               |
|--------------------|---------------|--------------------|---------------|---------------|
| Input parameters   | Average value | Standard deviation | Maximum value | Minimum value |
|                    | $\bar{x}$     | $(\sigma)$         | $(x_{max})$   | $(x_{min})$   |
| Frequency (Hz)     | 1992.25       | 2620.91            | 8000.00       | 63.00         |
| Wind speed (m/s)   | 8.00          | 1.43               | 10.00         | 6.00          |

doi:10.1371/journal.pone.0103414.t001

implemented for noise assessment of Wind Turbine Generator Systems (WTGS) in [5]. Paper [6] focused on the optimization of six airfoils which are widely used on small scale wind turbines in terms of the noise emission and performance criteria. The main purpose of this optimization process was to decrease the noise emission levels while increasing the aerodynamic performance of a small scale wind turbine by adjusting the shape of the airfoil. The analysis in [7] indicated that it is very important to collect rotor speed during acoustical measurements of a small wind turbine (SWT) which is variable speed. The objective of study [8] was to locate and identify the noise sources in a wind turbine, thereby determining the relative importance of inflow noise and self-noise according to the power regulation method used. From these findings, it was concluded that different strategies may be needed for noise reduction in a wind turbine, depending on the power regulation method. Findings from interdisciplinary research linking noise measurements from small wind installations with an investigation into the effect of individual personality traits and noise perception were presented in [9]. The perception and opinions of people exposed to wind turbine noise was analyzed in [10]. Observations of audio noise in frequency range 20–20 000 Hz from wind turbines were presented in [11]. Paper [12] concluded that wake-rotor interaction plays a role by causing variations in turbulent-inflow noise and dynamic stall. Annoyance, recognition and detection of noise from a single wind turbine were studied in [13] by means of a two-stage listening experiment with 50 participants with normal hearing abilities. The purpose of study [14] was to evaluate the aerodynamic noise generated from a small wind turbine. A prediction method for the estimation of the noise generated from a full-scale wind turbine rotor using wind tunnel test data measured with both a small-scale rotor was discussed in [15].

Two kinds of approaches are mainly needed to resolve wind turbine noise. First, the generated noise needs to be reduced and second, the extent of noise impact needs to be determined for post compensation or pre-damage reduction during wind turbine

construction. To do this, we need a proper noise analysis and noise propagation method.

Noise generated from wind turbine has been predicted by integrated numerical or CFD methods. In this study is analyzed noise level of wind turbines in relation to wind speed fluctuation. Since the using of CFD for the wind turbine noise level analyzing could be very challenging and time consuming, soft computing techniques are preferred. It is attempted to estimate the sound noise level of wind turbines as relation of effective wind speed and sound frequency by soft computing methodology i.e. adaptive neuro-fuzzy inference system (ANFIS). Afterwards the ANFIS performance will be compared with the other soft computing techniques like support vector regression (SVR) and artificial neural network (ANN).

ANFIS is one of the most powerful types of neural network system [16]. ANFIS shows very good learning and prediction capabilities, which makes it an efficient tool to deal with encountered uncertainties in any system. ANFIS, as a hybrid intelligent system that enhances the ability to automatically learn and adapt, was used by researchers in various engineering systems [17,18,19]. So far, there are many studies of the application of ANFIS for estimation and real-time identification of many different systems [20,21,22]. Fuzzy Inference System (FIS) is the main core of ANFIS. FIS is based on expertise expressed in terms of 'IF-THEN' rules and can thus be employed to predict the behavior of many uncertain systems. FIS advantage is that it does not require knowledge of the underlying physical process as a precondition for its application. Thus ANFIS integrates the FIS with a back-propagation learning algorithm of neural network.

The key goal of this investigation is to establish an ANFIS for estimation of the wind turbine noise level octave band in regard to sound frequency and wind input speed. The basic idea behind the soft computing methodology is to collect input/output data pairs and to learn the proposed network from these data. This technique gives fuzzy logic the capability to adapt the membership function parameters that best allow the associated FIS to track the given input/output data [23,24,25]. A CFD simulation is carried out to extract the training and checking data for the ANFIS network (Table S1).

## Materials and Methods

### Noise Assessment

Wind turbines generate sound via various routes, both mechanical and aerodynamic. As the technology has advanced, wind turbines have gotten much quieter, but sound from wind turbines is still an important siting criterion. Sound emissions from wind turbine have been one of the more studied environmental impact areas in wind energy engineering. Sound levels can be measured, but, similar to other environmental concerns, the

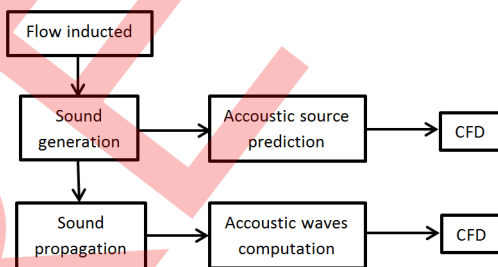**Figure 1.** Overview of the CFD for acoustics of wind turbine.

doi:10.1371/journal.pone.0103414.g001

**Table 2.** The basic nomenclature for the CFD simulations of acoustic wave propagation.

| Quantity     | Description                              | Equation                         |
|--------------|------------------------------------------|----------------------------------|
| $P_0$        | atmospheric pressure                     | 101,325 Pa                       |
| $p$          | acoustic pressure                        |                                  |
| $P$          | total pressure                           | $P = P_0 + p$                    |
| $\rho$       | density                                  |                                  |
| $\rho_0$     | atmospheric density                      | 1.293 kg/m <sup>3</sup>          |
| $s$          | condensation                             | $s = (\rho - \rho_0) / \rho_0$   |
| $c$          | speed of sound                           | 331 m/s                          |
| $\mathbf{u}$ | particle velocity (a 3 component vector) | $\mathbf{u} = \{u_x, u_y, u_z\}$ |
| $\gamma$     | ratio of specific heats for air          | 1.4                              |

doi:10.1371/journal.pone.0103414.t002

public’s perception of the acoustic impact of wind turbines is, in part, a subjective determination.

Operating sound produced from wind turbines is considerably different in level and nature than most large scale power plants, which can be classified as industrial sources. Wind turbines are often positioned in rural or remote areas that have a corresponding ambient sound character. Furthermore, while noise may be a concern to the public living near wind turbines, much of the sound emitted from the turbines is masked by ambient or the background sounds of the wind itself.

The sound produced by wind turbines has diminished as the technology has improved. As blade airfoils have become more efficient, more of the wind energy is converted into rotational energy, and less into acoustic energy. Vibration damping and improved mechanical design have also significantly reduced noise from mechanical sources.

**Sound and Noise**

Sounds are characterized by their magnitude and frequency. There can be loud low frequency sounds, soft high frequency sounds and loud sounds that include a range of frequencies. The human ear can detect a very wide range of both sound levels and frequencies, but it is more sensitive to some frequencies than others.

Sound is generated by numerous mechanisms and is always associated with rapid small scale pressure fluctuations, which produce sensations in the human ear. Sound waves are characterized in terms of their wavelength ( $\lambda$ ), frequency ( $f$ ) and velocity ( $v$ ), where  $v$  is found from:

$$v = f\lambda \tag{1}$$

The velocity of sound is a function of the medium through which it travels, and it generally travels faster in more dense mediums. The velocity of sound is about 340 m/s in air at standard pressures. Sound frequency denotes the “pitch” of the sound and, in many cases, corresponds to notes on the musical scale. An octave is a frequency range between a sound with one frequency and one with twice that frequency, a concept often used to define ranges of sound frequency values. The frequency range of human hearing is quite wide, generally ranging from about 20 to 20000 Hz (about 10 octaves). Finally, sounds experienced in daily life are usually not a single frequency, but are formed from a mixture of numerous frequencies, from numerous sources.

**Sound Power, Pressure and Intensity**

It is important to distinguish between the various measures of the magnitude of sounds: sound power level and sound pressure level. The sound power or acoustic power is the sound energy constantly transferred per second from the sound source. Sound pressure is a property of sound at a given observer location and can be measured there by a single microphone.

Because of the wide range of sound pressures to which the ear responds, sound pressure is an inconvenient quantity to use in graphs and tables. In addition, the human ear does not respond linearly to the amplitude of sound pressure, and, to approximate it, the scale used to characterize the sound power or pressure

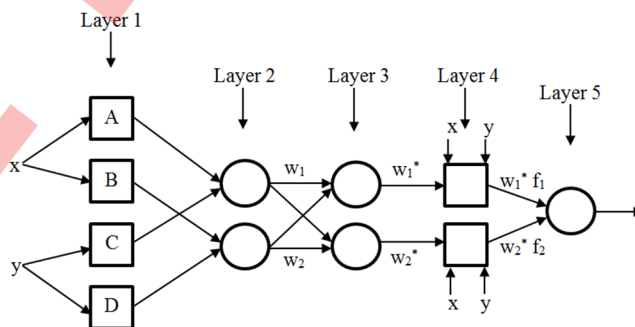

**Figure 2. ANFIS structure.**  
doi:10.1371/journal.pone.0103414.g002

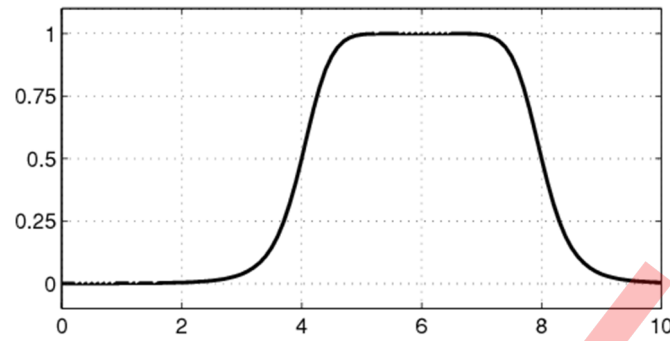

**Figure 3. Bell-shaped membership function (a = 2, b = 4, c = 6).**  
doi:10.1371/journal.pone.0103414.g003

amplitude of sound is logarithmic. Whenever the magnitude of an acoustical quantity is given in a logarithmic form, it is said to be a level in decibels (dB) above or below a zero reference level.

Sound intensity,  $L_I$ , is defined as the power of the sound per unit area, and so can be measured in  $W/m^2$ , but is more commonly measured in units of decibels, as:

$$L_I = 10 \log_{10}(-I/I_0) \quad (2)$$

where the reference intensity,  $I_0$ , is often the threshold of hearing at 1000 Hz:  $I_0 = 10^{-12} W/m^2$ .

Because audible sound consists of pressure waves, sound power is also quantifiable by its relation to a reference pressure. The sound power level of a source,  $L_w$  in units of decibels (dB), and is given by:

$$L_w = 10 \log_{10}(-P/P_0) \quad (3)$$

with  $P$  equal to the sound power level in units of power density and  $P_0$  a reference sound power (often  $P_0 = 2 \times 10^{-5} N/m^2$ ).

The sound pressure level of a sound,  $L_p$ , in units of decibels (dB), is given by:

$$L_p = 20 \log_{10}(-p/p_0) \quad (4)$$

with  $p$  equal to the effective sound pressure and  $p_0$  a reference sound pressure.

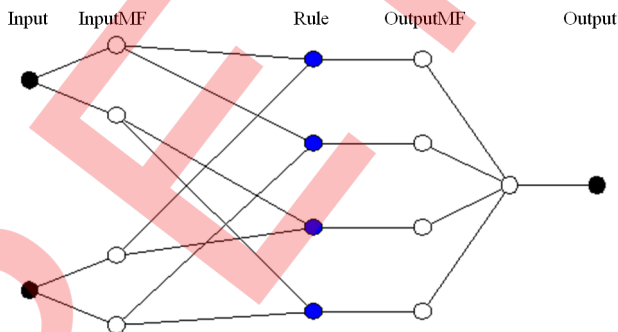

**Figure 4. ANFIS structure with two inputs for wind turbine noise assessment.**  
doi:10.1371/journal.pone.0103414.g004

### Sound from Wind Turbines

There are four types of sound that can be generated by wind turbine operation: tonal, broadband, low frequency, and impulsive.

Tonal sound is defined as sound at discrete frequencies. It is caused by components such as meshing gears, non-aerodynamic instabilities interacting with a rotor blade surface, or unstable flows over holes or slits or a blunt trailing edge.

Broadband sound is characterized by a continuous distribution of sound pressure with frequencies greater than 100 Hz. It is often caused by the interaction of wind turbine blades with atmospheric turbulence, and also described as a characteristic “swishing” or “whooshing” sound.

Low frequency sound with frequencies in the range of 20 to 100 Hz is mostly associated with downwind rotors (turbines with the rotor on the downwind side of the tower). It is caused when the turbine blade encounters localized flow deficiencies due to the flow around a tower.

Impulsive sound is described by short acoustic impulses or thumping sounds that vary in amplitude with time. It is caused by the interaction of wind turbine blades with disturbed air flow around the tower of a downwind machine.

The sources of sounds emitted from operating wind turbines can be divided into two categories:

- 1) Mechanical sounds, from the interaction of turbine components, and
- 2) Aerodynamic sounds, produced by the flow of air over the blades.

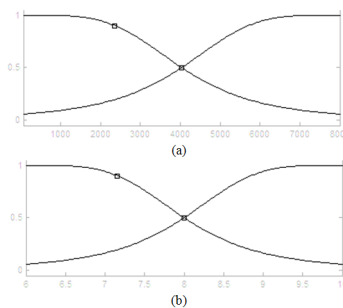

**Figure 5. ANFIS membership functions before training procedure for (a) sound frequency and (b) wind speed fuzzification.**  
doi:10.1371/journal.pone.0103414.g005

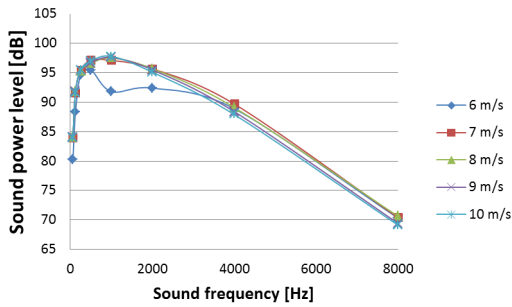

**Figure 6. Training and checking data for wind turbine noise assessment.**  
doi:10.1371/journal.pone.0103414.g006

Mechanical sounds originate from the relative motion of mechanical components and the dynamic response among them. Sources of such sounds include:

1. Gearbox
2. Generator
3. Yaw Drives
4. Cooling Fans
5. Auxiliary Equipment (e.g., hydraulics)

Since the emitted sound is associated with the rotation of mechanical and electrical equipment, it tends to be tonal, although it may have a broadband component. For example, pure tones can be emitted at the rotational frequencies of shafts and generators, and the meshing frequencies of the gears.

In addition, the hub, rotor, and tower may act as loudspeakers, transmitting the mechanical sound and radiating it. The transmission path of the sound can be air-borne or structure-borne. Air-borne means that the sound is directly propagated from the component surface or interior into the air. Structure-borne sound is transmitted along other structural components before it is radiated into the air.

Aerodynamic broadband sound is typically the largest component of wind turbine acoustic emissions. It originates from the flow of air around the blades. Aerodynamic sound generally increases with rotor speed. The various aerodynamic sound generation mechanisms have to be considered. They are divided into three groups:

1. **Low Frequency Sound:** Sound in the low frequency part of the sound spectrum is generated when the rotating blade

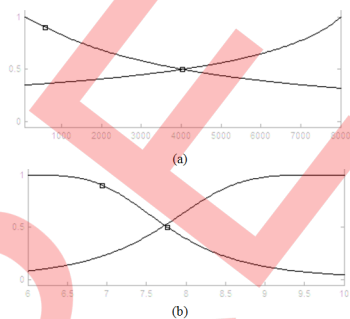

**Figure 7. ANFIS membership functions after training procedure for (a) sound frequency and (b) wind speed fuzzification.**  
doi:10.1371/journal.pone.0103414.g007

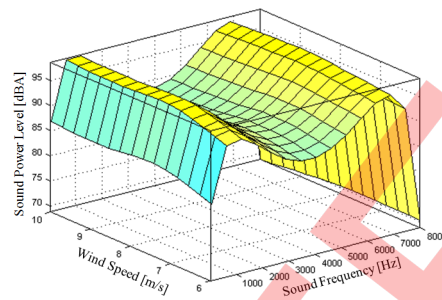

**Figure 8. ANFIS predicted relationship between wind speed, sound frequency and sound power level of the wind turbines.**  
doi:10.1371/journal.pone.0103414.g008

encounters localized flow deficiencies due to the flow around a tower, wind speed changes, or wakes shed from other blades.

2. **Inflow Turbulence Sound:** Depends on the amount of atmospheric turbulence. The atmospheric turbulence results in local force or local pressure fluctuations around the blade.
3. **Airfoil Self Noise:** This group includes the sound generated by the air flow right along the surface of the airfoil. This type of sound is typically of a broadband.

**Input parameters**

As a data-driven model, the ability of the ANFIS to make reasonable estimations is mostly dependent on input parameter selection. Adequate consideration of the factors controlling the system studied is therefore crucial to developing a reliable network. Dataset are created according to the experiments. For two-input dataset the input parameters (sound frequency and wind speed) are collected to be defined as input for the learning technique. For the experiments, 70% of the data was used to train samples and the subsequent 30% served to test samples. A summary of the statistical properties of the wind turbine noise is provided in Table 1.

The wind turbine acousting modeling is performed in ANSYS solver by computational fluid dynamics (CFD) procedure. Figure 1 shows the overview of the CFD acoustic simulation.

The main part of the algorithm is acoustic source prediction where CFD uses acoustic wave equations to predict and to compute acoustic wave's propagation. The basic nomenclature for the simulations is shown in Table 2 as follows.

First important equation to mention is for acoustic pressure:

$$p = P_0 \gamma s \tag{5}$$

From equilibrium analysis we can get Euler's equation which determines the acceleration of a particle of fluid:

$$\rho_0 \frac{\partial u}{\partial t} + \nabla p = 0 \tag{6}$$

The Euler's equation can be used to derive the acoustic wave equation. After calculations the preceding equation becomes

$$\nabla^2 p = \frac{1}{c^2} \frac{\partial^2 u}{\partial t^2} \tag{7}$$

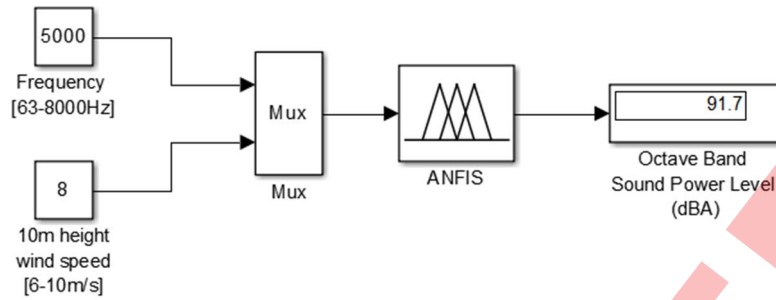

**Figure 9. Simulink block diagram for estimation of sound power level of wind turbines.**  
doi:10.1371/journal.pone.0103414.g009

This is the linear acoustic wave equation where

$$c = \sqrt{\frac{P_o \gamma}{\rho_0}} \tag{8}$$

is the speed of sound in air.

**Adaptive neuro-fuzzy application**

Fuzzy Inference System (FIS) is the main core of ANFIS. FIS is based on expertise expressed in terms of ‘IF–THEN’ rules and can thus be employed to predict the behavior of many uncertain systems. FIS advantage is that it does not require knowledge of the underlying physical process as a precondition for its application. Thus ANFIS integrates the fuzzy inference system with a back-propagation learning algorithm of neural network. The basic structure of a FIS consists of three conceptual components: a rule base, which contains a selection of fuzzy rules; a database, which defines the membership functions (MFs) used in the fuzzy rules; and a reasoning mechanism, which performs the inference procedure upon the rules and the given facts to derive a reasonable output or conclusion. These intelligent systems combine knowledge, technique and methodologies from various sources. They possess human-like expertise within a specific domain – adapt themselves and learn to do better in changing environments. In ANFIS, neural networks recognize patterns, and help adaptation to environments. ANFIS is tuned with a back propagation algorithm based on the collection of input-output data.

ANFIS model will be established in this study to estimate the sound level of wind turbines in relation to input effective wind speed and sound frequency. Training and checking data for the ANFIS network is extracted from the CFD analysis and

simulations of wind turbines. With a proper training scheme and fine filtered data-sets, ANFIS is capable to estimate wind turbine noise quite accurately since it learns from training data. This measurement-free architecture also makes it immediately available for operation once they are trained.

The ANFIS network inputs are: input wind speed at 10 m height and sound frequency. There were two membership functions on each input. In this study bell-shaped membership functions were chosen with maximum equal to 1 and minimum equal to 0. Fuzzy logic toolbox in MATLAB was used for the entire process of training and evaluation of fuzzy inference system. Figure 2 shows an ANFIS structure with two inputs.

In this work, the first-order Sugeno model with two inputs and fuzzy IF-THEN rules of Takagi and Sugeno’s type is used:

$$\text{if } x \text{ is } A \text{ and } y \text{ is } C \text{ then } f_1 = p_1x + q_1y + r \tag{9}$$

The first layer consists of input variables membership functions (MFs). This layer just supplies the input values to the next layer. In the first layer every node is an adaptive node with a node function

$$O = \mu(x),$$

where  $\mu(x)_i$  are MFs.

In this study, bell-shaped MFs (17) with maximum equal to 1 and minimum equal to 0 is chosen

$$f(x; a,b,c) = \frac{1}{1 + \left(\frac{x-c}{a}\right)^{2b}} \tag{10}$$

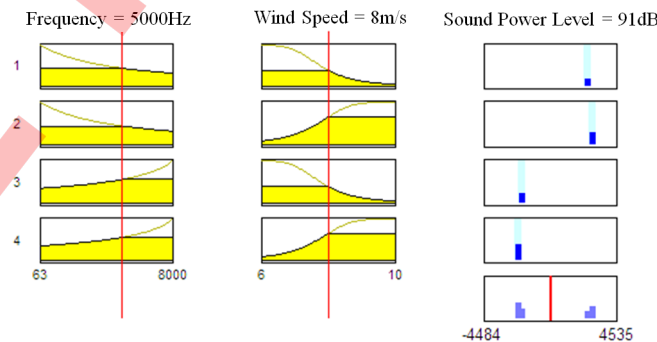

**Figure 10. Fuzzy inference system relationship between wind speed, sound frequency and sound power level of the wind turbines.**  
doi:10.1371/journal.pone.0103414.g010

**Table 3.** Performance criteria.

| Criteria                       | Calculation                                                                                                                                     |
|--------------------------------|-------------------------------------------------------------------------------------------------------------------------------------------------|
| Root mean squared error (RMSE) | $RMSE = \sqrt{\frac{1}{N_T} \sum_{i=1}^{N_T} (d_i - y_i)^2}$ (15)                                                                               |
| Correlation coefficient (R)    | $R = \frac{\sum d_i y_i - \frac{\sum d_i \sum y_i}{N}}{\sqrt{(\sum d_i^2 - \frac{(\sum d_i)^2}{N})(\sum y_i^2 - \frac{(\sum y_i)^2}{N})}}$ (16) |

doi:10.1371/journal.pone.0103414.t003

where the bell-shaped function depends on three parameters a, b and c. The parameter b is usually positive. The parameter c located the center of the curve as it is shown in Figure 3.

The second layer (membership layer) checks for the weights of each MFs. It receives the input values from the 1st layer and acts as MFs to represent the fuzzy sets of the respective input variables. Every node in the second layer is non-adaptive and this layer multiplies the incoming signals and sends the product out like

$$w_i = \mu(x)_i \times \mu(x)_{i+1} \tag{11}$$

Each node output represents the firing strength of a rule or weight.

The third layer is called the rule layer. Each node (each neuron) in this layer performs the pre-condition matching of the fuzzy rules, i.e. they compute the activation level of each rule, the number of layers being equal to the number of fuzzy rules. Each node of these layers calculates the weights which are normalized. The third layer is also non-adaptive and every node calculates the ratio of the rule's firing strength to the sum of all rules' firing strengths like

$$w_i^* = \frac{w_i}{w_1 + w_2} \tag{12}$$

i = 1,2.

The outputs of this layer are called normalized firing strengths or normalized weights.

The fourth layer is called the defuzzification layer and it provides the output values resulting from the inference of rules. Every node in the fourth layer is an adaptive node with node function

$$O_i^4 = w_i^* \times f = w_i^* \times (p_i x + q_i y + r_i) \tag{13}$$

where {p,q,r} is the parameter set and in this layer is referred to as consequent parameters.

The fifth layer is called the output layer which sums up all the inputs coming from the fourth layer and transforms the fuzzy classification results into a crisp (binary). The output represents estimated noise level of the wind turbine. The single node in the fifth layer is not adaptive and this node computes the overall output as the summation of all incoming signals

$$O_i^5 = \sum_i w_i^* \times f = \frac{\sum_i w_i^* \times f}{\sum_i w_i^*} \tag{14}$$

The hybrid learning algorithms were applied to identify the parameters in the ANFIS architectures. In the forward pass of the hybrid learning algorithm, functional signals go forward until Layer 4 and the consequent parameters are identified by the least squares estimate. In the backward pass, the error rates propagate backwards and the premise parameters are updated by the gradient descent.

**Results**

The ANFIS network for wind turbine noise assessment is shown in Figure 3. There are two inputs: effective wind speed (m/s) and sound frequency (Hz). Two membership functions are used for each input (InputMF) as it shows in Figure 4 in the second layer of the ANFIS structure.

The two fuzzy membership functions for each input before training procedure are shown in Figure 5. Since there are two membership functions for each input, there are four fuzzy rules as it shown in Figure 4 in layer 3.

Fuzzy rules are defined according to the extracted training data for CFD analysis. The training data is shown in Figure 6 where the sound power level of the wind turbine is shown in relation to

**Table 4.** User-defined parameters for SVR\_rbf, ANN and ANFIS.

| Support Vector regression | RBF kernel                                                                                                                    | C   | γ     | ε   |
|---------------------------|-------------------------------------------------------------------------------------------------------------------------------|-----|-------|-----|
|                           |                                                                                                                               | 200 | 0.001 | 0.2 |
| ANN                       | Learning rate = 0.2, momentum = 0.1, hidden node = 3,6,10, number of iteration = 1000                                         |     |       |     |
| ANFIS                     | Number of rules: 8, membership function: generalized bell, number of iteration:1000, identification methods:grid partitioning |     |       |     |

doi:10.1371/journal.pone.0103414.t004

**Table 5.** Performance indices of various approaches for wind turbine noise level estimation.

| Method | Training     |                             | Testing      |                             |
|--------|--------------|-----------------------------|--------------|-----------------------------|
|        | Error (RMSE) | Correlation coefficient (R) | Error (RMSE) | Correlation coefficient (R) |
| ANFIS  | 5.81         | 0.804571                    | 5.2          | 0.8558529                   |
| SVR    | 5.84         | 0.779218                    | 5.59         | 0.7319146                   |
| ANN    | 5.91         | 0.712324                    | 5.78         | 0.6908456                   |

doi:10.1371/journal.pone.0103414.t005

wind speed and sound frequency. After training procedure the average testing error of the ANFIS network is 5.2.

Figure 7 shows membership functions after training procedure for each input. These functions belong to the layer 4 (OutputMF) of the ANFIS structure (Figure 3).

The final decision surfaces after training procedure of the ANFIS networks are shown in Figure 8.

The sound power level of wind turbines as function of the wind speed and sound frequency is implemented in MATLAB Simulink block diagram as it shown in Figure 9. It can be seen for sound frequency 5000 Hz and wind speed of 8 m/s at 10 m height, the block diagram determines sound power level of the turbine 91.7dB. Figure 10 shows fuzzy inference system in action for these two inputs where can be seen results for input sound frequency of 5000 Hz and wind speed of 8 m/s at 10 m height.

### Performance criteria

To evaluate the performance of the ANFIS model against other soft computing techniques, SVR and ANN, several measures were used. The root mean squared error (RMSE) served to evaluate the differences between the expected and actual values. Meanwhile, the correctness of the forecast models and coefficient of (R) was determined. The parameters are calculated as indicated in Table 3, where  $n$  is the total number of test data,  $d_i$  is experimental value and  $y_i$  is forecast value.

### Performance analysis

Radial basis function (RBF) was applied as the Kernel function for wind noise level prediction by SVR methodology in this study. The three parameters associated to RBF Kernels are  $C$ ,  $\epsilon$  and  $r$ . SVM model accuracy is principally dependent on model parameter selection. In our scheme, a default value of  $\epsilon = 0.1$  seemed to perform well. To select user-defined parameters (i.e.  $C$ ,  $d$  and  $g$ ), a large number of trials were carried out with different combinations of  $C$  and  $d$  for radial basis function kernel. Table 4 provides the optimal values of user-defined parameters for this dataset with RBF kernel-based SVR. Also in Table 4 can be seen ANN and ANFIS parameters.

To evaluate the performance of the ANFIS method, experiments were conducted to determine the relative significance of each independent parameter (inputs) on the noise level (output). The root mean squared error (RMSE) and correlation coefficient (R) served to evaluate the differences between the expected and actual values for ANFIS. Table 5 compares the ANFIS model with the SVR and ANN models. The results in Table 5 show that the ANFIS has the most significant effect on wind turbine noise level for various inputs. The average RMSE = 5.81 is for ANFIS, compared to average RMSE = 5.84 for the SVR and RMSE = 5.91 for the ANN adopted in the wind turbine model in the training phase. In testing phase, RMSE = 5.2 is for ANFIS,

RMSE = 5.59 is for SVR and RMSE = 5.78 is for ANN. It is clear that ANFIS method outperforms other soft computing techniques.

### Conclusions

Wind turbine is favored renewable and sustainable energy. Noise emission is one of the major concerns in wind turbine industry and especially for small scale wind turbines, which are mostly erected to the urban areas; the concern is turning into a problem. The effect of wind turbine noise in human health, especially for medium and long periods of exposure has been the object of various studies. Noise levels can be measured, but, similar to other environmental attentions, the public's perception of the noise impact of wind turbines is in part a subjective determination.

The impact of the effective wind speed and sound frequency on the wind turbine noise is investigated in the paper. This paper presents an ANFIS technique for the wind turbine noise level predictions. In this study was an analyzed noise level of wind turbines in relation to wind speed and sound frequency by the adaptive neuro-fuzzy methodology. A Simulink model was developed in MATLAB with the ANFIS network for the wind turbine sound power level estimation. Simulations were run in MATLAB and the results were observed on the corresponding output blocks. The main advantages of the ANFIS scheme are: computationally efficient, well-adaptable with optimization and adaptive techniques. ANFIS can also be used with systems handling more complex parameters. Another advantage of ANFIS is its speed of operation, which is much faster than in other control strategies; the tedious task of training membership functions is done in ANFIS. The performance of the ANFIS approach was compared against the results provided by SVR and ANN obtaining interesting improvements in the prediction system. ANFIS is better than SVR and ANN in terms of root mean square error and coefficient error. From the results it can be concluded that ANFIS method can predict wind turbine noise level with higher estimation accuracy and shorter computation time.

### Supporting Information

#### Table S1 Measured wind turbine noise as training and checking data for ANFIS network.

(DAT)

### Author Contributions

Conceived and designed the experiments: DP SS RH SM. Performed the experiments: DP SS RH SM. Analyzed the data: DP SS RH SM. Contributed reagents/materials/analysis tools: DP SS RH SM. Wrote the paper: DP SS RH SM. Performed application of methodology: DP. Measured the data: SS.

## References

1. Kim H, Lee S, Son E, Lee S, Lee S (2012) Aerodynamic noise analysis of large horizontal axis wind turbines considering fluid structure interaction. *Renewable Energy* 4: 46–53.
2. Rogers T, Omer S (2012) The effect of turbulence on noise emissions from a micro-scale horizontal axis wind turbine. *Renewable Energy* 41: 180–184.
3. Tadamas A, Zangeneh M (2011) Numerical prediction of wind turbine noise. *Renewable Energy* 36: 1902–1912.
4. Son E, Kim H, Kim H, Choi W, Lee S (2010) Integrated numerical method for the prediction of wind turbine noise and the long range propagation. *Current Applied Physics* 10: S316–S319.
5. Lin B, Xiaofeng L, Xingxi H (2010) Measurement system for wind turbines noises assessment based on LabVIEW. *Measurement* 44: 445–453.
6. Göçmen T, Özerdem B (2012) Airfoil optimization for noise emission problem and aerodynamic performance criterion on small scale wind turbines. *Energy* 46: 62–71.
7. Vick B, Broneske S (2013) Effect of blade flutter and electrical loading on small wind turbine noise. *Renewable Energy* 50: 1044–1052.
8. Lee GS, Cheong C, Shin SH, Jung SS (2012) A case study of localization and identification of noise sources from a pitch and a stall regulated wind turbine. *Applied Acoustics* 73: 817–827.
9. Taylor J, Eastwick C, Lawrence C, Wilson R (2013) Noise levels and noise perception from small and micro wind turbines. *Renewable Energy* 55: 120–127.
10. Arezes PM, Bernardo CA, Ribeiro E, Dias H (2014) Implications of wind power generation: exposure to wind turbine noise. 2nd World Conference On Business, Economics And Management-WCBEM, *Procedia-Social and Behavioral Sciences* 109: 390–395.
11. Baath LB (2013) Noise spectra from wind turbine. *Renewable Energy* 57: 512–519.
12. Laratro A, Arjomandi M, Kelso R, Cazzolato B (2014) A discussion of wind turbine interaction and stall contributions to wind farm noise. *J. Wind. Eng. Ind. Aerodyn.* 127: 1–10.
13. Renterghem TV, Bockstael A, Weirt VD, Botteldooren D (2013) Annoyance, detection and recognition of wind turbine noise. *Science of the Total Environment* 456–457: 333–345.
14. Lee S, Lee S (2014) Numerical and experimental study of aerodynamic noise by a small wind turbine. *Renewable Energy* 65: 108–112.
15. Ryi J, Choi J.S, Lee S, Lee S (2014) A full-scale prediction method for wind turbine rotor noise by using wind tunnel test data. *Renewable Energy* 65: 257–264.
16. Jang JSR (1993) ANFIS: Adaptive-Network-based Fuzzy Inference Systems. *IEEE Trans. On Systems, Man, and Cybernetics* 23: 665–685.
17. Petković D, Issa M, Pavlović ND, Pavlović NT, Zentner L (2012) Adaptive neuro-fuzzy estimation of conductive silicone rubber mechanical properties. *Expert Systems with Applications* 39: 9477–9482.
18. Petković D, Čojbašić Ž (2012) Adaptive neuro-fuzzy estimation of automatic nervous system parameters effect on heart rate variability. *Neural Computing & Application* 21(8): 2065–2070.
19. Petković D, Issa M, Pavlović ND, Zentner L, Čojbašić Ž (2012) Adaptive neuro fuzzy controller for adaptive compliant robotic gripper. *Expert Systems with Applications* 39: 13295–13304.
20. Ekici BB, Aksoy UT (2011) Prediction of building energy needs in early stage of design by using ANFIS. *Expert Systems with Applications* 38: 5352.
21. Khajeh A, Modarres H, Rezaee B (2009) Application of adaptive neuro-fuzzy inference system for solubility prediction of carbon dioxide in polymers. *Expert Systems with Applications* 36: 5728.
22. Inal M (2008) Determination of dielectric properties of insulator materials by means of ANFIS: A comparative study. *Expert Systems with Applications* 195: 34.
23. Wahida Banu RSD, Shakila Banu A, Manoj D (2011) Identification and Control of Nonlinear Systems using Soft Computing Techniques. *International Journal of Modeling and Optimization* 1(1): 24–28.
24. Grigorie TL, Botez RM (2009) Adaptive neuro-fuzzy inference system-based controllers for smart material actuator modelling. *J. Aerospace Engineering* 5: 655–668.
25. Akçayol MA (2004) Application of adaptive neuro-fuzzy controller for SRM. *Advances in Engineering Software* 35: 129–137.
